# Supplementary material for: Heterogeneous Ni-MOF/V2CTx–MXene hierarchically-porous nanorods for robust and high energy density hybrid supercapacitors
Source: Royal Society of Chemistry journal article supplement (doi:10.1039/d2ta02114e), 2022-01-01
Supplement: d2ta02114e1.pdf [file d2ta02114e1.pdf]

## Supporting Information

# Heterogeneous Ni-MOF/V<sub>2</sub>CT<sub>x</sub>-MXene Hierarchically-Porous Nanorods for Robust and High Energy Density Hybrid Supercapacitors

Xifeng Yang,<sup>§,a,b</sup> Yuhui Tian,<sup>§,c</sup> Shuang Li,<sup>\*,a,b</sup> Ya-Pan Wu,<sup>a,b</sup> Qichun Zhang,<sup>d</sup> Dong-Sheng Li<sup>\*,a,b</sup> and Shanqing Zhang<sup>\*,c</sup>

<sup>a</sup> *College of Materials and Chemical Engineering, Key Laboratory of Inorganic Nonmetallic Crystalline and Energy Conversion Materials, China Three Gorges University, Yichang 443002, P. R. China*

<sup>b</sup> *Hubei Three Gorges Laboratory, Yichang, Hubei 443007, P. R. China*

<sup>c</sup> *Centre for Catalysis and Clean Energy, School of Environment and Science, Gold Coast Campus, Griffith University, Gold Coast, Queensland 4222, Australia.*

<sup>d</sup> *Department of Materials Science and Engineering, City University of Hong Kong, Kowloon, Hong Kong SAR, China.*

<sup>§</sup> *Xifeng Yang and Yuhui Tian contributed equally to this work.*

E-mail: [lishmail@126.com](mailto:lishmail@126.com); [lidongsheng1@126.com](mailto:lidongsheng1@126.com); [s.zhang@griffith.edu.au](mailto:s.zhang@griffith.edu.au)

## Material characterization

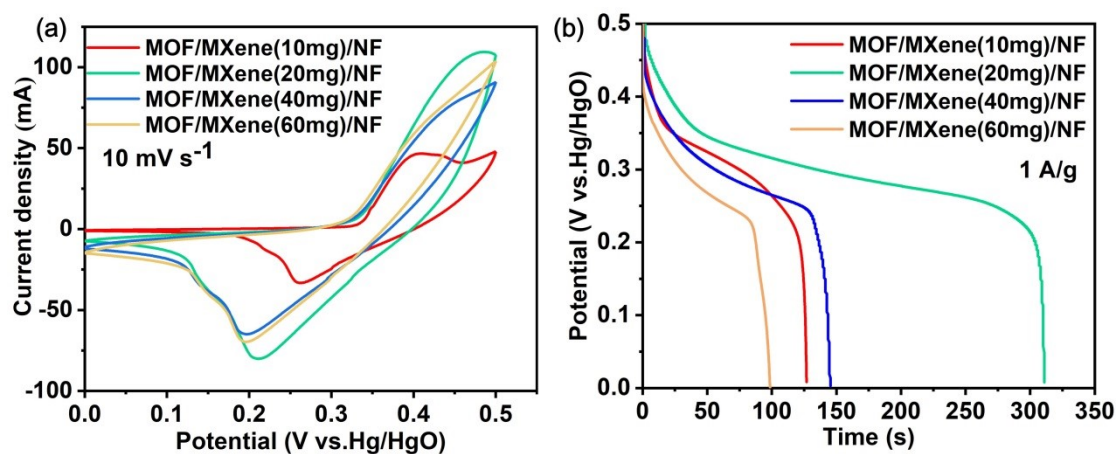

**Fig. S1** (a) CV and (b) GCD curves of MOF/MXene/NF composites with different MXene loading amount. By comparison, the performance-optimal MOF/MXene/NF composite with 20 mg MXene loading amount was chose as precursor for the followed annealing treatment.

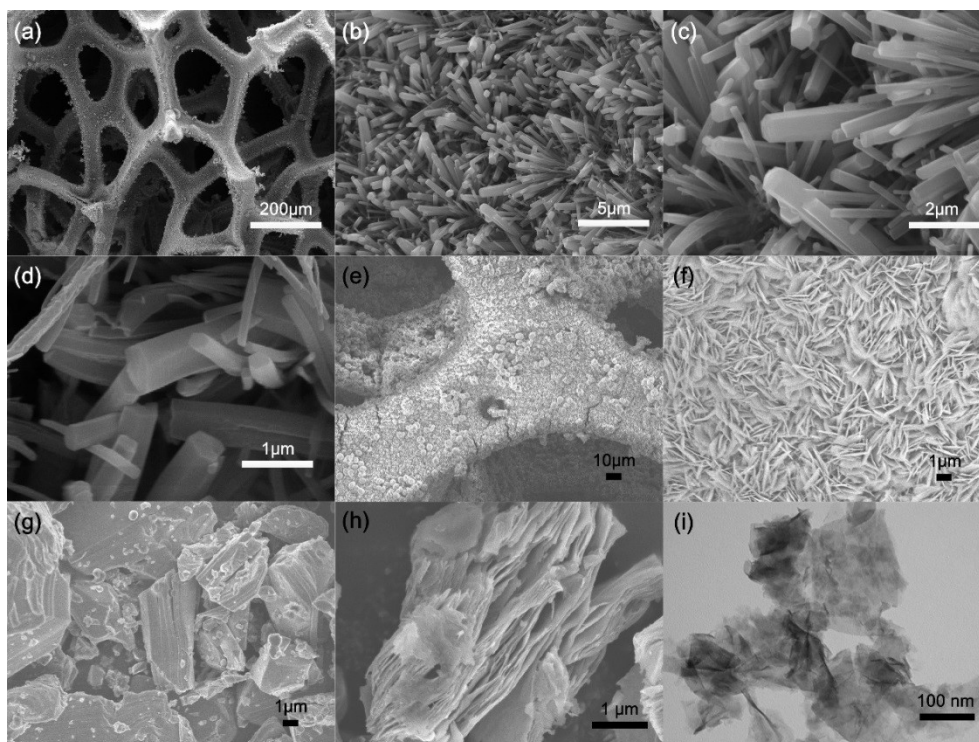

**Fig. S2** (a-d) SEM images at different magnification rates of the MOF/MXene/NF. (e) Low and (f) high magnification SEM images of Ni-BDC/NF. (g) SEM images of the pristine V<sub>2</sub>AlC. (h) Layered V<sub>2</sub>CT<sub>x</sub>. (i) TEM image of the as-exfoliated V<sub>2</sub>CT<sub>x</sub> nanosheets.

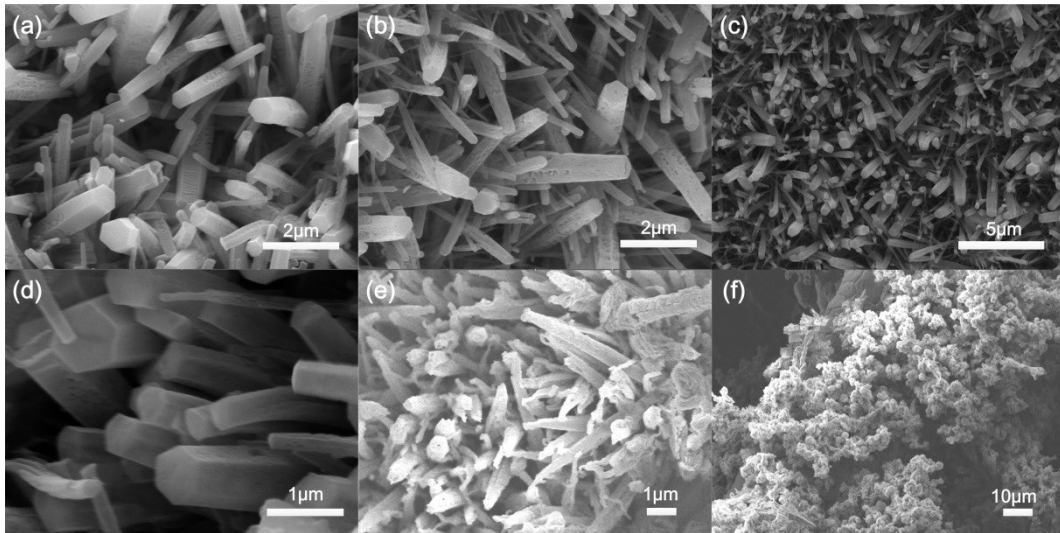

**Fig. S3** (a) SEM images of the MOF/MXene/NF-150. (b) SEM of the Ni-MOF/NF-200. (c) Low and (d) high magnification SEM images of MOF/MXene/NF-300. (e) The SEM image of the MOF/MXene/NF-350. (f) The SEM image of the MOF/MXene/NF-380.

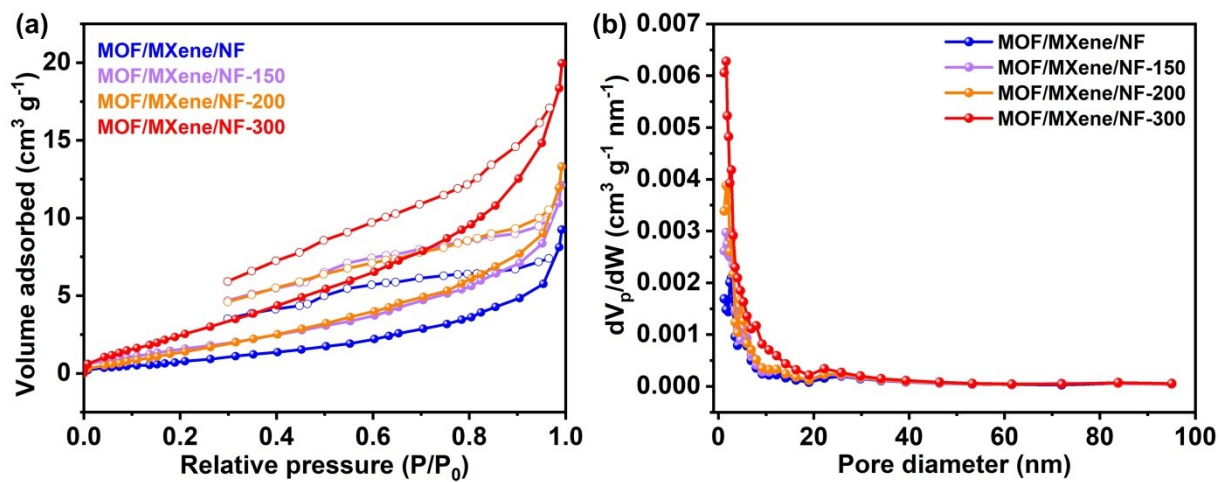

**Fig. S4** (a)  $N_2$  adsorption-desorption isotherm and (b) pore-size distribution curve of the four samples.

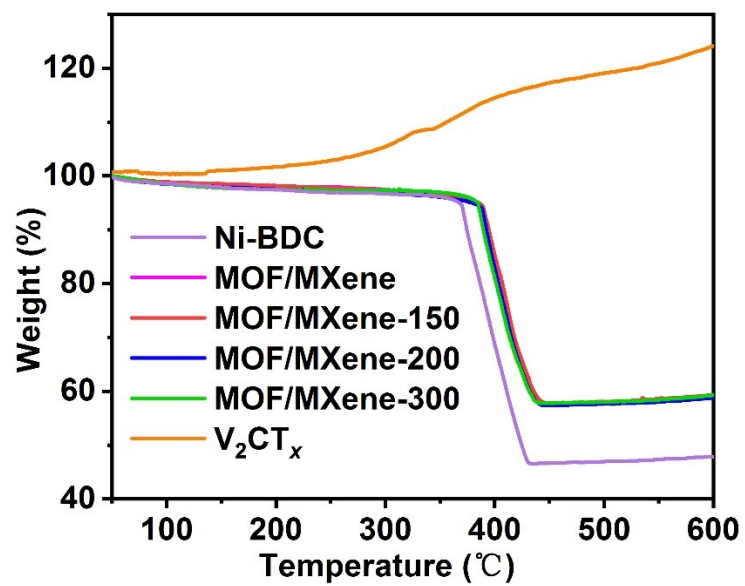

Fig. S5 TG curves of the powdered samples.

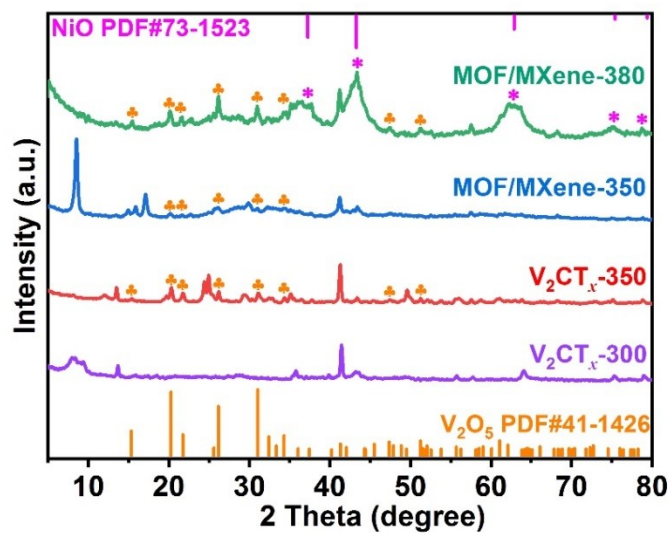

**Fig. S6** XRD patterns of the powdered V<sub>2</sub>CT<sub>x</sub>-300, V<sub>2</sub>CT<sub>x</sub>-350, MOF/MXene-350 and MOF/MXene-380. It can be seen that the structure of V<sub>2</sub>CT<sub>x</sub> is still kept at 300 °C and the structure of MOF is maintained below 350 °C.

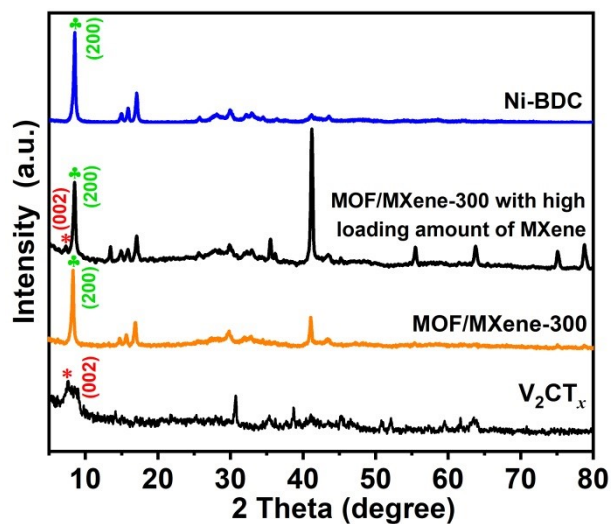

**Fig. S7** The XRD patterns of the collected MOF/MXene-300 powders. Although no obvious diffraction peaks for V<sub>2</sub>CT<sub>x</sub> are observed in target composite (MOF/MXene-300) due to the low loading amount, the characteristic (002) peak at 7.4° of V<sub>2</sub>CT<sub>x</sub> and (200) peak at 8.9 of Ni-BDC can be clearly seen in the XRD pattern of MOF/MXene-300 with high loading amount of MXene, directly confirming the co-existence of MXene and MOF in the composite.



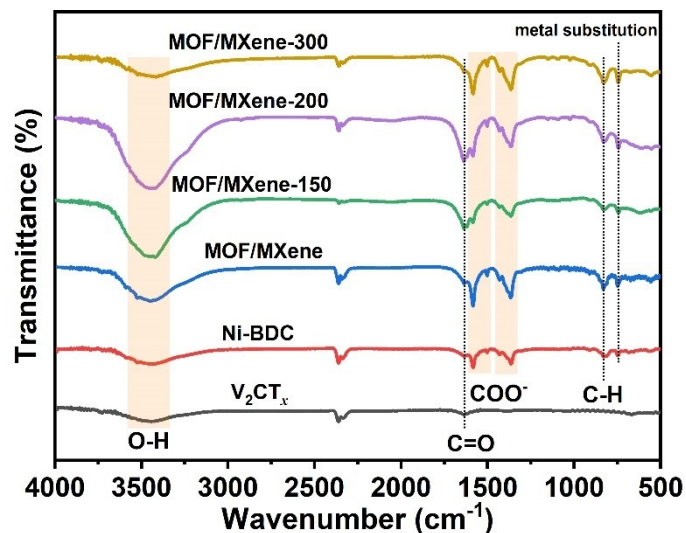

**Fig. S8** FT-IR spectra of the collected powder samples. These FTIR spectra show a broad peak between 3200–3600 cm<sup>-1</sup>, which can be assigned to the stretching vibration of O–H. The characteristic vibration at 1630 cm<sup>-1</sup> corresponding to the C=O for V<sub>2</sub>CT<sub>x</sub> and Ni-BDC. Furthermore, there are some sharp peaks in the regions of 1490–1600 cm<sup>-1</sup> and 1350–1450 cm<sup>-1</sup>, which belong to the asymmetric and symmetric stretching vibrations of the carboxyl group, respectively. In addition, the IR band at 830 cm<sup>-1</sup> is the characteristic aromatic CH stretching vibration. The IR band located at 744 cm<sup>-1</sup> can be indexed to the metal substitution on benzene groups. Based on the above analysis, the absorption bands of MOF/MXene are almost identical to those of Ni-BDC and V<sub>2</sub>CT<sub>x</sub> in the IR spectrum, which proves that MOF/MXene is successfully formed.

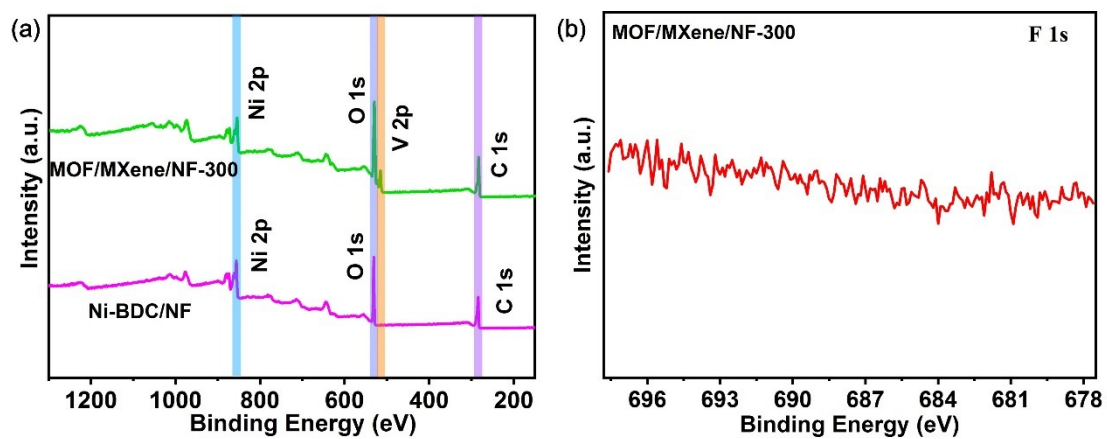

**Fig. S9** (a) XPS survey spectra of the Ni-BDC/NF and MOF/MXene/NF-300. (b) F 1s spectra of the MOF/MXene/NF-300.

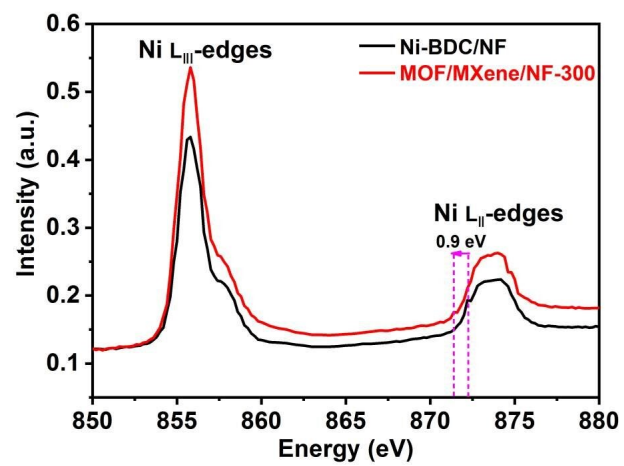

**Fig. S10** Ni L-edge XANES spectra of the samples.

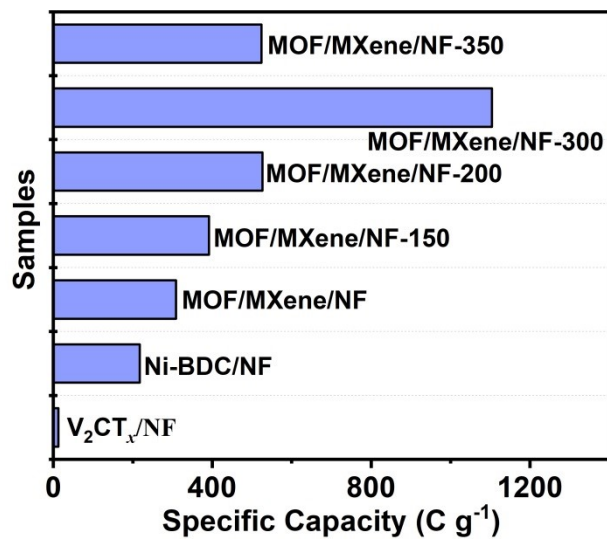

**Fig. S11** Specific capacity comparison of the samples at 1 A g<sup>-1</sup>.

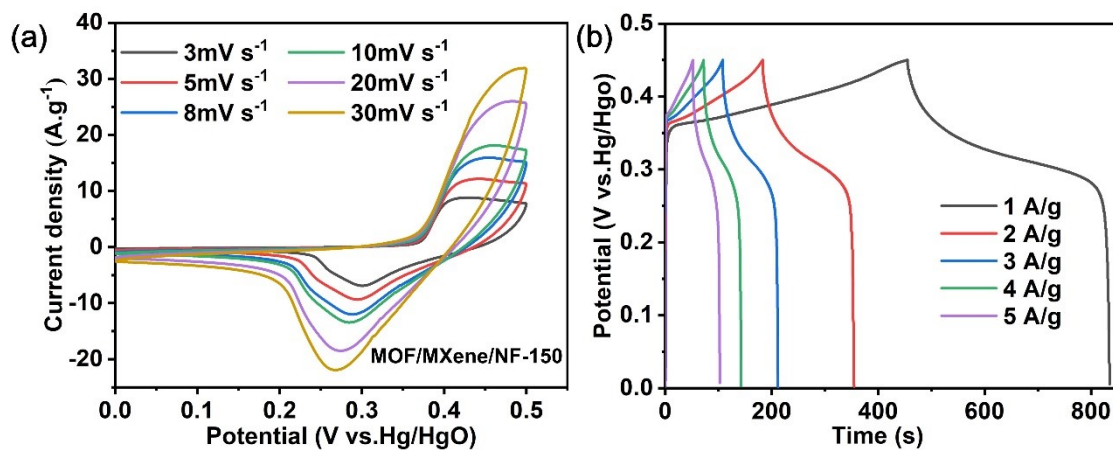

**Fig. S12** (a) CV curves of MOF/MXene/NF-150 at different scan rates. (b) GCD curves of MOF/MXene/NF-150 at different current densities.

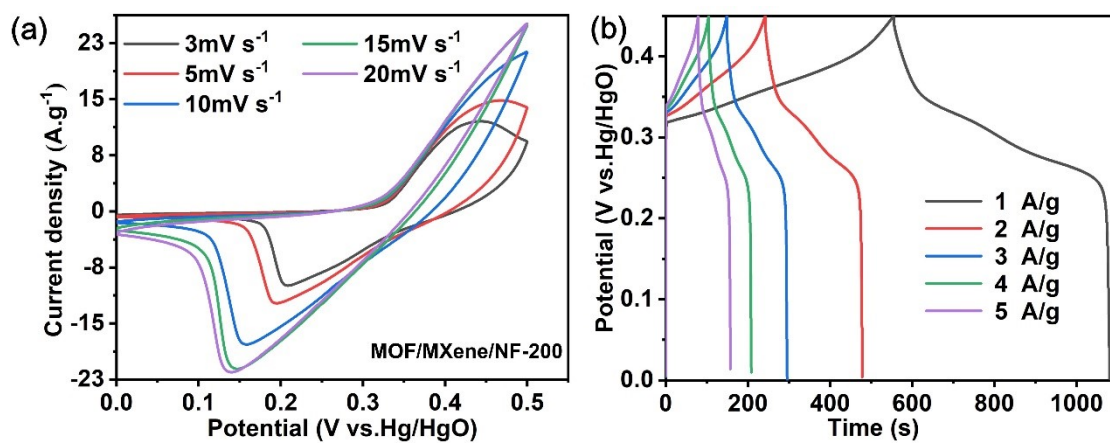

**Fig. S13** (a) CV curves of MOF/MXene/NF-200 at different scan rates. (b) GCD curves of MOF/MXene/NF-200 at different current densities.

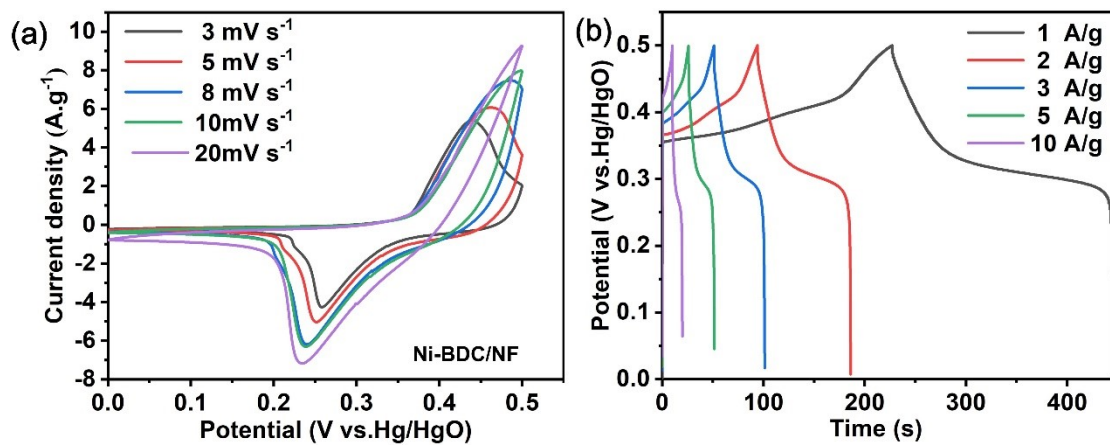

**Fig. S14** (a) CV curves of Ni-BDC/NF at different scan rates. (b) GCD curves of Ni-BDC/NF at different current densities.

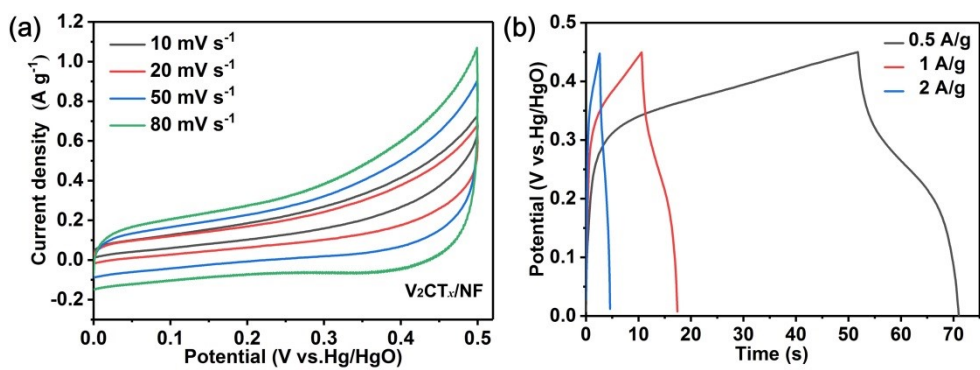

**Fig. S15** (a) CV curves of  $V_2CT_x/NF$  at different scan rates. (b) GCD curves of  $V_2CT_x$  at different current densities.



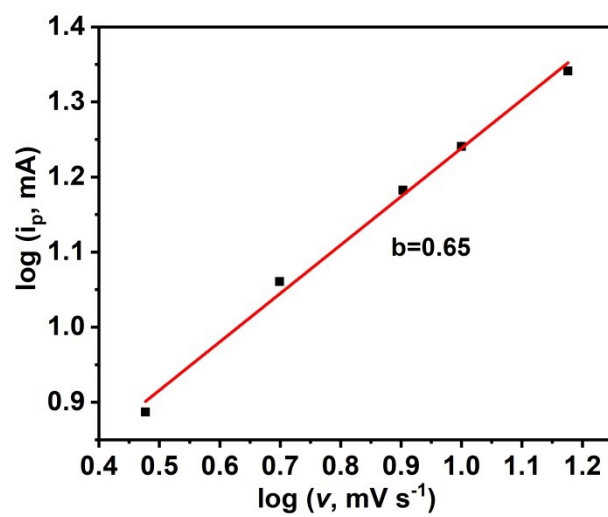

**Fig. S16** The cathodic peaks current density as a function of square root of scan rate for the CoTC-300.

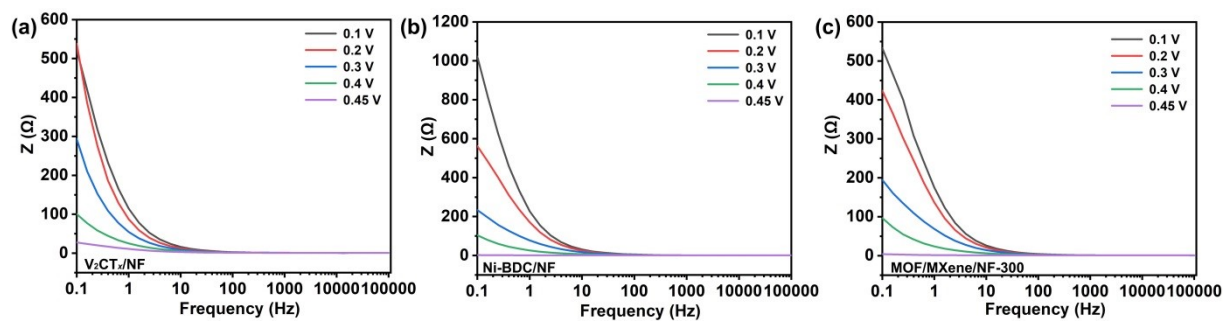

**Fig. S17** The Bode phase angle plot of the (a)  $V_2CT_x/NF$  (b)  $Ni-BDC/NF$  and (c)  $MOF/MXene/NF-300$  electrodes as a function of applied frequency.

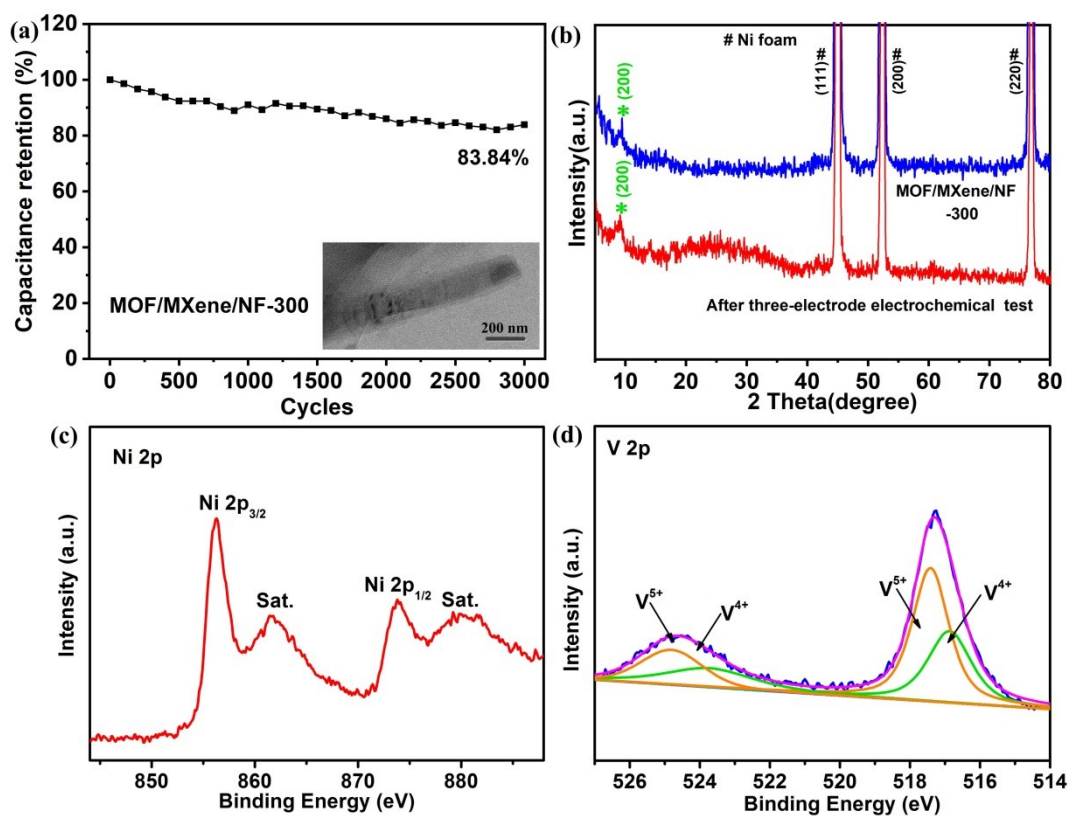

**Fig. S18** (a) The cyclic stability of the three-electrode test for MOF/MXene/NF-300. The inset in (a) is the TEM image, (b) XRD pattern, (c) Ni 2p XPS and (d) V 2p XPS of MOF/MXene/NF-300 after cycling stability test.

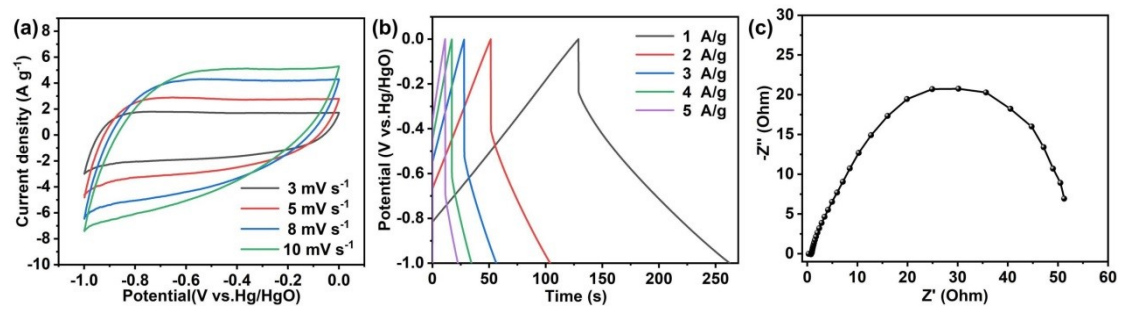

**Fig. S 19** (a) The CV curves and (b) GCD curves and (c) EIS of the activated carbon/NF.

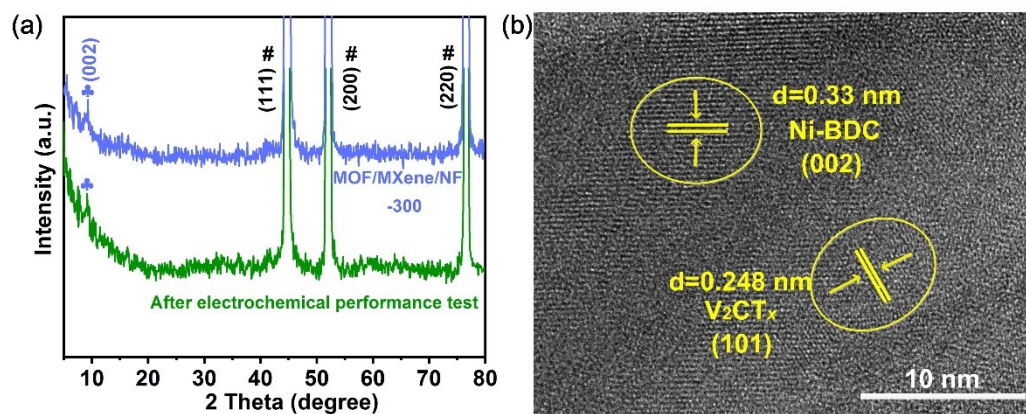

**Fig. S20** Characterizations of the MOF/MXene/NF-300 after electrochemical performance test: (a) XRD. (b) HRTEM.

**Table S1.** Comparison of the relevant electrochemical parameters and performances of the optimal electrode and the other similar materials.

| Electrode materials                                     | Electrolyte                        | Current collector | Potential window /V | Capacitance/F g <sup>-1</sup> | Capacity/C g <sup>-1</sup> | Stability in % Retention (number of cycles) | Highest Energy Density /Wh kg <sup>-1</sup> | Highest Power Density /W kg <sup>-1</sup> | Cathode Materials to assemble device                | Ref.      |
|---------------------------------------------------------|------------------------------------|-------------------|---------------------|-------------------------------|----------------------------|---------------------------------------------|---------------------------------------------|-------------------------------------------|-----------------------------------------------------|-----------|
| MOF/MXene/NF-300                                        | 1 M KOH                            | nickel foam       | 1.5                 | 2453                          | 1103.9                     | 118.1% (15 000)                             | 46.3                                        | 746.8                                     | AC                                                  | this work |
| Ni-MOF                                                  | 6 M KOH                            | nickel foam       |                     | 1148                          | 459.2                      | 90% (2000)                                  |                                             |                                           |                                                     | 1         |
| NiCo-MOF                                                | 2 M KOH                            | nickel foam       | 1.5                 | 1202.1                        | 601.05                     | 76.7% (5000)                                | 49.4                                        | 562.5                                     | AC                                                  | 2         |
| Ni/Co-MOF                                               | 1 M LiOH                           | glassy carbon     |                     | 530.4                         | 265.2                      | 99.75% (2000)                               |                                             |                                           |                                                     | 3         |
| T-Nb <sub>2</sub> O <sub>5</sub>                        | 1 M LiClO <sub>4</sub>             | copper foil       |                     | 169.23                        | 330                        |                                             |                                             |                                           |                                                     | 4         |
| Ni-S/d-Ti <sub>3</sub> C <sub>2</sub>                   | 6 M KOH                            | carbon cloth      | 1.9                 | 1680.8                        | 840.4                      | 71.4% (10 000)                              | 20                                          | 500                                       | d-Ti <sub>3</sub> C <sub>2</sub>                    | 5         |
| Ti <sub>3</sub> C <sub>2</sub> /CuS                     | 1 M KOH                            | nickel foam       | 1.5                 | 282.5                         | 169.5                      | 82.4% (5000)                                | 15.4                                        | 750.2                                     | Ti <sub>3</sub> C <sub>2</sub> MXene                | 6         |
| MXene-NiCo <sub>2</sub> S <sub>4</sub> @NF              | 3 M KOH                            | nickel foam       | 1.6                 | 1193.38                       | 596.69                     | 80.4% (3000)                                | 27.24                                       | 0.48 k                                    | AC                                                  | 7         |
| NiCo <sub>2</sub> S <sub>4</sub> /MXene                 | 3 M KOH                            | nickel foam       | 1.7                 | 2056                          | 1028                       | 94.27% (5000)                               | 68.7                                        | 850                                       | AC                                                  | 8         |
| Co-MOF@Ni                                               | 1 M KOH                            | nickel foam       |                     | 2872.5                        | 1149                       | 92.1% (3000)                                |                                             |                                           |                                                     | 9         |
| NiCoAl-LDH/V <sub>4</sub> C <sub>3</sub> T <sub>x</sub> | 1 M KOH                            | nickel foam       | 1.6                 | 1045                          | 627                        | 98% (10 000)                                | 71.7                                        | 20 000                                    | AC                                                  | 10        |
| 200-Ti <sub>3</sub> C <sub>2</sub> T <sub>x</sub>       | 1 M H <sub>2</sub> SO <sub>4</sub> | MXene films       | 0.7                 | 429                           | 300.3                      | 89% (5000)                                  | 29.2                                        | 390                                       | 200-Ti <sub>3</sub> C <sub>2</sub> T <sub>x</sub>   | 11        |
| d-Ti <sub>3</sub> C <sub>2</sub> /NF                    | 6 M KOH                            | nickel foam       | 1.3                 | 654                           | 327                        | 80.6% (5000)                                | 18.1                                        | 397.8                                     | bulk Ti <sub>3</sub> C <sub>2</sub>                 | 12        |
| NiCo-MOF/Ti <sub>3</sub> C <sub>2</sub> T <sub>x</sub>  | 2 M KOH                            | nickel foam       | 1.5                 | 815.2                         | 366.84                     | 82.3% (10 000)                              | 39.5                                        | 562.5                                     | AC                                                  | 13        |
| Ti <sub>3</sub> C <sub>2</sub> T <sub>x</sub> /CNTs     | 3 M H <sub>2</sub> SO <sub>4</sub> | film              | 1                   | 375                           | 300                        | 95.9% (10 000)                              | 9.2                                         | 96.1                                      | Ti <sub>3</sub> C <sub>2</sub> T <sub>x</sub> /CNTs | 14        |
| N, O co-doped C@Ti <sub>3</sub> C <sub>2</sub>          | 6 M KOH                            | nickel foam       | 1.2                 | 250.6                         | 200.48                     | 94% (5000)                                  | 10.8                                        | 600                                       | N, O co-doped C@Ti <sub>3</sub> C <sub>2</sub>      | 15        |

**Table S2** The diffusion coefficient values of all the electrodes in KOH electrolyte

|                                                             | V <sub>2</sub> CT <sub>r</sub> /NF | Ni-BDC/NF   | MOF/MXene/<br>NF | MOF/MXene/<br>NF-150 | MOF/MXene/<br>NF-200 | MOF/MXene/<br>NF-300 | MOF/MXen<br>e/NF-350 |
|-------------------------------------------------------------|------------------------------------|-------------|------------------|----------------------|----------------------|----------------------|----------------------|
| Diffusion coefficient D, (cm <sup>2</sup> s <sup>-1</sup> ) | 2.84473E-14                        | 8.41208E-15 | 1.05211E-14      | 1.58042E-14          | 1.62229E-14          | 1.76897E-14          | 1.36537E-13          |

## References

- 1 X. Xiong, L. Zhou, W. Cao, J. Liang, Y. Wang, S. Hu, F. Yu and B. Li, *CrystEngComm*, 2017, **19**, 7177-7184.
- 2 Y. Wang, Y. Liu, H. Wang, W. Liu, Y. Li, J. Zhang, H. Hou and J. Yang, *ACS Appl. Energy Mater.*, 2019, **2**, 2063-2071.
- 3 H. Xia, J. Zhang, Z. Yang, S. Guo, S. Guo and Q. Xu, *Nano-Micro Lett.*, 2017, **9**, 43.
- 4 C. Zhang, M. Beidaghi, M. Naguib, M. R. Lukatskaya, M.-Q. Zhao, B. Dyatkin, K. M. Cook, S. J. Kim, B. Eng, X. Xiao, D. Long, W. Qiao, B. Dunn and Y. Gogotsi, *Chem. Mater.*, 2016, **28**, 3937-3943.
- 5 Y. Luo, C. Yang, Y. Tian, Y. Tang, X. Yin and W. Que, *J. Power Sources*, 2020, **450**, 227694.
- 6 Z. Pan, F. Cao, X. Hu and X. Ji, *J. Mater. Chem. A.*, 2019, **7**, 8984-8992.
- 7 H. Li, X. Chen, E. Zalnezhad, K. N. Hui, K. S. Hui and M. J. Ko, *J. Ind. Eng. Chem.*, 2020, **82**, 309-316.
- 8 J. Fu, L. Li, J. M. Yun, D. Lee, B. K. Ryu and K. H. Kim, *Chem. Eng. J.*, 2019, **375**, 121939.
- 9 R. Ramachandran, K. Rajavel, W. Xuan D. Lin and F. Wang, *Ceram. Int.*, 2018, **44**, 14425-14431.
- 10 X. Wang, H. Li, H. Li, S. Lin, J. Bai, J. Dai, C. Liang, X. Zhu, Y. Sun and S. Dou, *J. Mater. Chem. A.*, 2019, **7**, 2291-2300.
- 11 Z. Zhang, Z. Yao, X. Zhang and Z. Jiang, *Electrochim. Acta*, 2020, **359**, 136960.
- 12 J. Guo, Y. Zhao, A. liu and T. Ma, *Electrochim. Acta*, 2019, **305**, 164-174.
- 13 Y. Wang, Y. Liu, C. Wang, H. Liu, J. Zhang, J. Lin, J. Fan, T. Ding, J. E. Ryu and Z. Guo, *Eng. Sci.*, 2020, **9**, 50-59.
- 14 P. Zhang, Q. Zhu, R. A. Soomro, S. He, N. Sun, N. Qiao and B. Xu, *Adv. Funct. Mater.*, 2020, **30**, 2000922.
- 15 Z. Pan and X. Ji, *J. Power Sources*, 2019, **439**, 227068.
